# Supplementary material for: Inequalities in access to healthcare by local policy model among newly arrived refugees: evidence from population-based studies in two German states
Source: PubMed Central journal article supplement (PMC8785512; doi:10.1186/s12939-021-01607-y), 2022-01-24
Supplement: 12939_2021_1607_MOESM2_ESM.pdf [file 12939_2021_1607_MOESM2_ESM.pdf]

## **Additional file 2: List of ambulatory care-sensitive condition**

|                                                        |
|--------------------------------------------------------|
| Stroke                                                 |
| Angina                                                 |
| Heart failure                                          |
| High blood pressure                                    |
| Bronchitis                                             |
| Mental or behavioural disorders due to substance abuse |
| Depression                                             |
| Back pain                                              |
| Diarrhoea                                              |
| Flu                                                    |
| Ear, nose, and throat infections                       |
| Diabetes                                               |
| Epilepsy                                               |
| Sleeping problems                                      |
| Cavities                                               |
