# Supplementary material for: Inequalities in access to healthcare by local policy model among newly arrived refugees: evidence from population-based studies in two German states
Source: PubMed Central journal article supplement (PMC8785512; doi:10.1186/s12939-021-01607-y), 2022-01-24
Supplement: 12939_2021_1607_MOESM3_ESM.pdf [file 12939_2021_1607_MOESM3_ESM.pdf]

### Additional file 3: Overview of clusters, stratification, and survey weights

| Level   | ACs BW                                                                                        | RCs BW                                                                                      | ACs BE                                                                                        | Cluster                      | Stratification (size)                                                                                | Finite population correction                               |
|---------|-----------------------------------------------------------------------------------------------|---------------------------------------------------------------------------------------------|-----------------------------------------------------------------------------------------------|------------------------------|------------------------------------------------------------------------------------------------------|------------------------------------------------------------|
| Level 1 | We randomly selected several ACs from all possible units (prob. of inclusion ca. 3%)          | We deterministically chose several RCs based on location and size (prob. of inclusion 100%) | We randomly selected several ACs from all possible units (prob. of inclusion ca. 3%)          | AC/RC: facility              | <i>Strata1 (BW)</i><br>AC: 33<br>RC: 1<br><i>Strata2 (BW+BE)</i><br>AC-BW: 19<br>RC-BW: 1<br>AC-BE 3 | Total no. of AC:<br>BW n=1945<br>BE n=72                   |
| Level 2 | We attempted to recruit all <b>individuals</b> within each facility (prob. of inclusion 100%) | We randomly chose a number of <b>rooms</b> in each facility (prob. of inclusion ca. 25%)    | We attempted to recruit all <b>individuals</b> within each facility (prob. of inclusion 100%) | AC: individuals<br>RC: rooms |                                                                                                      | Total no. of rooms/individuals in chosen facility (n=1123) |

AC=accommodation centre; RC=reception centre, BW=Baden-Wuerttemberg; BE=Berlin
