# Supplementary material for: Inequalities in access to healthcare by local policy model among newly arrived refugees: evidence from population-based studies in two German states
Source: PubMed Central journal article supplement (PMC8785512; doi:10.1186/s12939-021-01607-y), 2022-01-24
Supplement: 12939_2021_1607_MOESM4_ESM.pdf [file 12939_2021_1607_MOESM4_ESM.pdf]

#### Additional file 4: Overview of imputation models

| <b>Model variables for imputation</b> | <b>Imputation method</b>    |
|---------------------------------------|-----------------------------|
| Age                                   | Predictive mean matching    |
| sex                                   | Logistic regression model   |
| Nationality (region of origin)        | Polytomous regression model |
| Educational score                     | Predictive mean matching    |
| Residence status                      | Polytomous regression model |
| Time since arrival (months)           | Predictive mean matching    |
| Access model                          | Polytomous regression model |
| GP unmet needs                        | Logistic regression model   |
| Specialist unmet needs                | Logistic regression model   |
| GP 4-week-utilization                 | Logistic regression model   |
| Specialist 4-week-utilization         | Logistic regression model   |
| Emergency department use              | Logistic regression model   |
| Avoidable hospitalization             | Logistic regression model   |
| Chronical illness                     | Logistic regression model   |
| General health                        | Polytomous regression model |
| Family doctor                         | Logistic regression model   |
