# Supplementary material for: Inequalities in access to healthcare by local policy model among newly arrived refugees: evidence from population-based studies in two German states
Source: PubMed Central journal article supplement (PMC8785512; doi:10.1186/s12939-021-01607-y), 2022-01-24
Supplement: 12939_2021_1607_MOESM7_ESM.pdf [file 12939_2021_1607_MOESM7_ESM.pdf]

**Additional file 7: Detailed results related to Figure 3 – Results of logistic regression model (odds ratios and standard errors)**

|                           | <i>Specialist use</i> | <i>GP use</i>        | <i>Specialist unmet needs</i> | <i>GP unmet needs</i> | <i>Emergency dept. use</i> | <i>Avoidable hospitalization</i> |
|---------------------------|-----------------------|----------------------|-------------------------------|-----------------------|----------------------------|----------------------------------|
| <i>EHC (ref. HV)</i>      | 1.930**<br>(0.618)    | 1.425<br>(0.673)     | 1.935**<br>(0.513)            | 1.147<br>(0.360)      | 1.359<br>(0.495)           | 1.521<br>(0.536)                 |
| <i>Age</i>                | 1.015*<br>(0.00852)   | 1.028***<br>(0.0101) | 1.018*<br>(0.00896)           | 1.012<br>(0.00948)    | 0.995<br>(0.00918)         | 1.015<br>(0.00965)               |
| <i>Male (ref. female)</i> | 1.507**<br>(0.270)    | 1.719***<br>(0.334)  | 1.106<br>(0.207)              | 1.106<br>(0.218)      | 2.319***<br>(0.419)        | 1.145<br>(0.254)                 |
| <i>Constant</i>           | 0.217***<br>(0.0697)  | 0.309***<br>(0.104)  | 0.288***<br>(0.0949)          | 0.315***<br>(0.0951)  | 0.419**<br>(0.142)         | 0.204***<br>(0.0598)             |
| <i>Observations</i>       | 863                   | 863                  | 863                           | 863                   | 863                        | 863                              |
| <i>p-value (F-test)</i>   | 0.990                 | 0.708                | 0.567                         | 0.945                 | 0.083                      | 0.191                            |

Standard errors in parentheses; \*\*\*  $p < 0.01$ , \*\*  $p < 0.05$ , \*  $p < 0.1$
