# Supplementary material for: Inequalities in access to healthcare by local policy model among newly arrived refugees: evidence from population-based studies in two German states
Source: PubMed Central journal article supplement (PMC8785512; doi:10.1186/s12939-021-01607-y), 2022-01-24
Supplement: 12939_2021_1607_MOESM8_ESM.pdf [file 12939_2021_1607_MOESM8_ESM.pdf]

**Additional file 8: Detailed results related to Figure 4 – Results of logistic regression model (odds ratios and standard errors)**

|                                                     | <i>Specialist use</i> | <i>GP use</i>      | <i>Specialist unmet needs</i> | <i>GP unmet needs</i> | <i>Emergency dept. use</i> | <i>Avoidable hospitalization</i> |
|-----------------------------------------------------|-----------------------|--------------------|-------------------------------|-----------------------|----------------------------|----------------------------------|
| <i>EHC (ref. HV)</i>                                | 2.387**<br>(0.992)    | 2.175<br>(1.077)   | 2.014*<br>(0.730)             | 0.913<br>(0.372)      | 1.346<br>(0.479)           | 1.774<br>(0.729)                 |
| <i>Age</i>                                          | 1.001<br>(0.00916)    | 0.999<br>(0.00992) | 1.004<br>(0.0101)             | 0.990<br>(0.0109)     | 0.976**<br>(0.0117)        | 0.991<br>(0.0116)                |
| <i>Male (ref. female)</i>                           | 1.386*<br>(0.255)     | 1.619**<br>(0.344) | 1.054<br>(0.205)              | 1.039<br>(0.228)      | 2.238***<br>(0.413)        | 1.035<br>(0.262)                 |
| <i>Time since arrival (months)</i>                  | 0.997<br>(0.00351)    | 1.004<br>(0.00401) | 0.999<br>(0.00307)            | 1.006<br>(0.00367)    | 0.995<br>(0.00332)         | 0.998<br>(0.00356)               |
| <i>Region: Asia (ref. Europe)</i>                   | 1.000<br>(0.307)      | 1.880**<br>(0.540) | 1.246<br>(0.441)              | 0.928<br>(0.286)      | 0.750<br>(0.184)           | 1.026<br>(0.290)                 |
| <i>Region: Africa (ref. Europe)</i>                 | 1.358<br>(0.515)      | 1.571<br>(0.538)   | 1.232<br>(0.550)              | 0.949<br>(0.334)      | 0.910<br>(0.332)           | 1.563<br>(0.631)                 |
| <i>Region: Other (ref. Europe)</i>                  | 1.330<br>(0.618)      | 1.991*<br>(0.765)  | 1.180<br>(0.475)              | 1.015<br>(0.444)      | 1.229<br>(0.520)           | 1.312<br>(0.655)                 |
| <i>Rather bad general health (ref. rather good)</i> | 2.430***<br>(0.478)   | 1.854**<br>(0.504) | 2.323***<br>(0.437)           | 2.363***<br>(0.576)   | 1.499*<br>(0.345)          | 1.752**<br>(0.454)               |

|                                                     |                       |                       |                     |                     |                     |                     |
|-----------------------------------------------------|-----------------------|-----------------------|---------------------|---------------------|---------------------|---------------------|
| <i>No chronic illness (ref. yes)</i>                | 1.099<br>(0.223)      | 2.516***<br>(0.681)   | 2.069***<br>(0.458) | 2.482***<br>(0.600) | 1.789**<br>(0.436)  | 3.103***<br>(0.784) |
| <i>Education: low (ref. high)</i>                   | 1.318<br>(0.332)      | 0.868<br>(0.201)      | 1.009<br>(0.246)    | 0.644*<br>(0.152)   | 1.133<br>(0.320)    | 1.233<br>(0.325)    |
| <i>Education: middle (ref. high)</i>                | 1.412<br>(0.317)      | 0.933<br>(0.243)      | 0.907<br>(0.195)    | 0.821<br>(0.195)    | 0.763<br>(0.203)    | 0.749<br>(0.206)    |
| <i>No family doctor (ref. yes)</i>                  | 1.931***<br>(0.451)   | 3.209***<br>(0.663)   | 0.643**<br>(0.120)  | 0.922<br>(0.186)    | 1.886***<br>(0.414) | 1.798***<br>(0.337) |
| <i>Reception centre (ref. accommodation centre)</i> | 1.498<br>(0.415)      | 1.975**<br>(0.606)    | 0.776<br>(0.336)    | 0.819<br>(0.305)    | 0.870<br>(0.244)    | 0.755<br>(0.269)    |
| <i>Constant</i>                                     | 0.0671***<br>(0.0473) | 0.0617***<br>(0.0394) | 0.281<br>(0.231)    | 0.415<br>(0.315)    | 0.564<br>(0.371)    | 0.171**<br>(0.123)  |
| <i>Observations</i>                                 | 863                   | 863                   | 863                 | 863                 | 863                 | 863                 |
| <i>p-value (F-test)</i>                             | 0.479                 | 0.779                 | 0.420               | 0.681               | 0.849               | >0.001              |

Standard errors in parentheses; \*\*\*  $p < 0.01$ , \*\*  $p < 0.05$ , \*  $p < 0.1$
