# Supplementary material for: Inequalities in access to healthcare by local policy model among newly arrived refugees: evidence from population-based studies in two German states
Source: PubMed Central journal article supplement (PMC8785512; doi:10.1186/s12939-021-01607-y), 2022-01-24
Supplement: 12939_2021_1607_MOESM9_ESM.pdf [file 12939_2021_1607_MOESM9_ESM.pdf]

**Additional file 9: Overview of effect of weighting on main outcomes in final regression models (design effects/DEFF)**

|                                  | <i>Specialist use</i> | <i>GP use</i> | <i>Specialist unmet needs</i> | <i>GP unmet needs</i> | <i>Emergency dept. use</i> | <i>Avoidable hospitalization</i> |
|----------------------------------|-----------------------|---------------|-------------------------------|-----------------------|----------------------------|----------------------------------|
| <i>HV (ref. regular access)</i>  | 1.485                 | 2.520         | 1.792                         | 1.911                 | 1.260                      | 1.929                            |
| <i>EHC (ref. regular access)</i> | 1.216                 | 1.596         | 1.137                         | 1.172                 | 1.032                      | 0.993                            |
| <i>EHC (ref. HV)</i>             | 1.257                 | 1.746         | 1.174                         | 1.259                 | 1.038                      | 1.229                            |
