# Supplementary material for: Inequalities in access to healthcare by local policy model among newly arrived refugees: evidence from population-based studies in two German states
Source: PubMed Central journal article supplement (PMC8785512; doi:10.1186/s12939-021-01607-y), 2022-01-24
Supplement: 12939_2021_1607_MOESM10_ESM.pdf [file 12939_2021_1607_MOESM10_ESM.pdf]

**Additional File 11: Fully adjusted Odds-Ratios (and 95%-CIs) of access to healthcare comparing between access models (ref=regular access), with urban/rural**

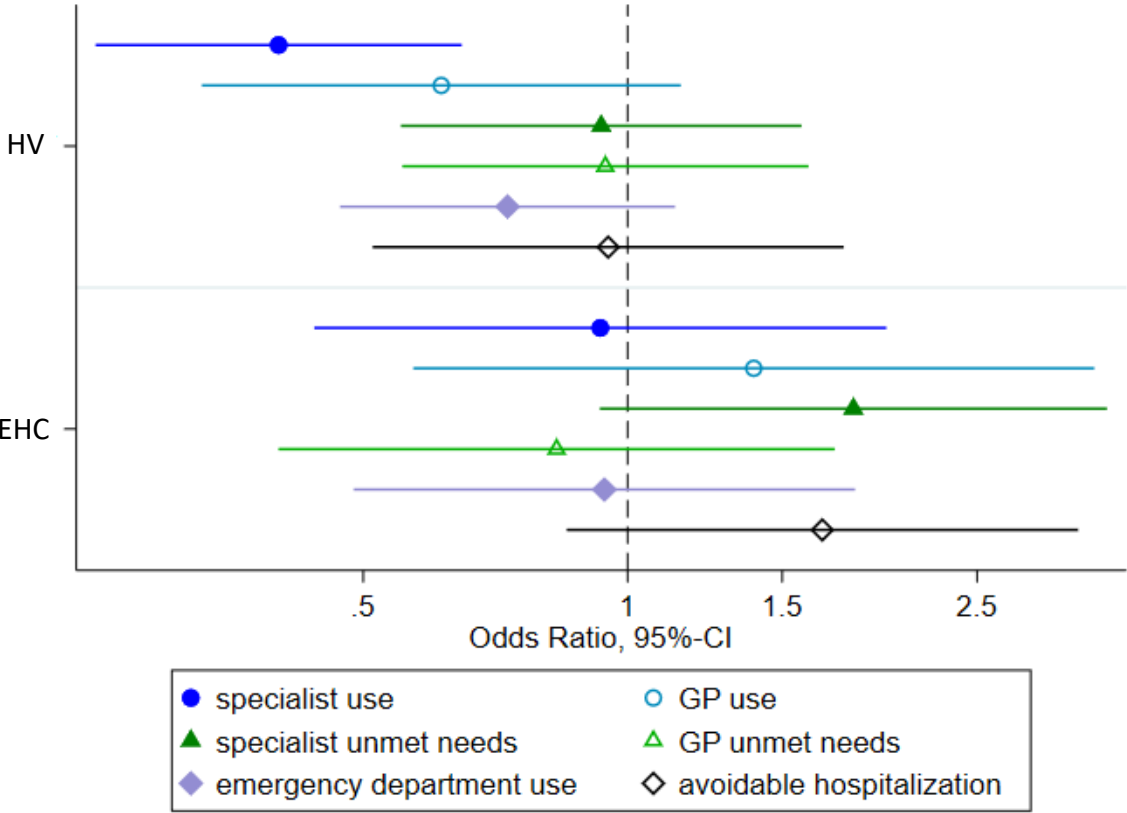

Legend: HV=Health care voucher; EHC=electronic health card; x-axis with 95% confidence intervals on a log-scale
