# Supplementary material for: Inequalities in access to healthcare by local policy model among newly arrived refugees: evidence from population-based studies in two German states
Source: Springer Nature journal article supplement (doi:10.1186/s12939-021-01607-y), 2022-01-24

## Additional file 1: Participants' flow diagram and response rate

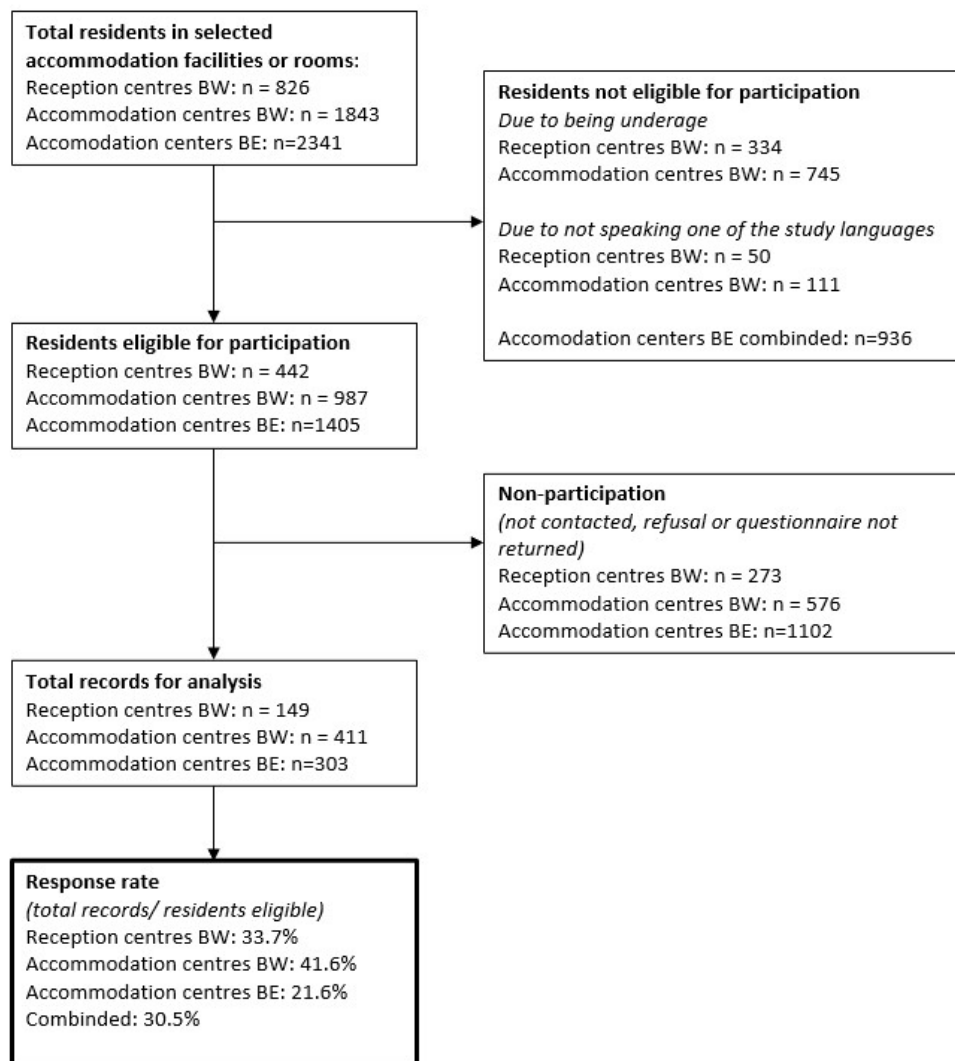

Supplement: MOESM1 [file 12939_2021_1607_MOESM1_ESM.pdf]
