# Supplementary material for: Inequalities in access to healthcare by local policy model among newly arrived refugees: evidence from population-based studies in two German states
Source: Springer Nature journal article supplement (doi:10.1186/s12939-021-01607-y), 2022-01-24
Supplement: MOESM5 [file 12939_2021_1607_MOESM5_ESM.pdf]

**Additional file 5: Detailed results related to Figure 1 – Results of logistic regression model (odds ratios and standard errors)**

|                                  | <i>Specialist use</i> | <i>GP use</i>        | <i>Specialist unmet needs</i> | <i>GP unmet needs</i> | <i>Emergency dept. use</i> | <i>Avoidable hospitalization</i> |
|----------------------------------|-----------------------|----------------------|-------------------------------|-----------------------|----------------------------|----------------------------------|
| <i>HV (ref. regular access)</i>  | 0.466***<br>(0.0937)  | 0.571**<br>(0.145)   | 1.095<br>(0.256)              | 0.915<br>(0.214)      | 0.761<br>(0.152)           | 0.996<br>(0.230)                 |
| <i>EHC (ref. regular access)</i> | 0.899<br>(0.279)      | 0.814<br>(0.339)     | 2.119***<br>(0.496)           | 1.050<br>(0.304)      | 1.034<br>(0.330)           | 1.514<br>(0.465)                 |
| <i>Age</i>                       | 1.015*<br>(0.00852)   | 1.028***<br>(0.0101) | 1.018*<br>(0.00896)           | 1.012<br>(0.00948)    | 0.995<br>(0.00918)         | 1.015<br>(0.00965)               |
| <i>Male (ref. female)</i>        | 1.507**<br>(0.270)    | 1.719***<br>(0.334)  | 1.106<br>(0.207)              | 1.106<br>(0.218)      | 2.319***<br>(0.419)        | 1.145<br>(0.254)                 |
| <i>Constant</i>                  | 0.466***<br>(0.0937)  | 0.571**<br>(0.145)   | 1.095<br>(0.256)              | 0.915<br>(0.214)      | 0.761<br>(0.152)           | 0.996<br>(0.230)                 |
| <i>Observations</i>              | 863                   | 863                  | 863                           | 863                   | 863                        | 863                              |
| <i>p-value (F-test)</i>          | 0.990                 | 0.708                | 0.567                         | 0.945                 | 0.083                      | 0.191                            |

Standard errors in parentheses; \*\*\*  $p < 0.01$ , \*\*  $p < 0.05$ , \*  $p < 0.1$
